# Supplementary material for: A half sandwich Ru(ii)-p-cymene nitrite complex selectively induces cell death in cisplatin-resistant malignant melanoma cells
Source: Royal Society of Chemistry journal article supplement (doi:10.1039/d4dt01012d), 2024-01-01
Supplement: d4dt01012d1.pdf [file d4dt01012d1.pdf]

## Electronic Supplementary Information

### A half-sandwich Ru(II)-p-cymene nitrite complex selectively induces cell death in cisplatin-resistant malignant melanoma cells.

Yin-Hsuan Sun<sup>a</sup>, Huey-Ling You<sup>b</sup>, Manmath Narwane<sup>a</sup>, Ru Xin Koi<sup>c</sup>, Chai-Lin Kao<sup>a,d</sup>, Shyng-Shiou F. Yuan<sup>d,f,g</sup>, Wei-Ting Liao<sup>e\*</sup>, Tsai-Te Lu<sup>c,h,i\*</sup> and Sodio C.N. Hsu<sup>a,d\*</sup>

<sup>a</sup>. Department of Medicinal and Applied Chemistry, Drug Development and Value Creation Research Centre, Kaohsiung Medical University, Kaohsiung 807, Taiwan

<sup>b</sup>. Department of Laboratory Medicine, Kaohsiung Chang Gung Memorial Hospital, Kaohsiung 833, Taiwan

<sup>c</sup>. Institute of Biomedical Engineering, National Tsing Hua University, Hsinchu 300, Taiwan

<sup>d</sup>. Translational Research Center, Department of Medical Research, Kaohsiung Medical University Hospital, Kaohsiung 807, Taiwan

<sup>e</sup>. Department of Biotechnology, Kaohsiung Medical University, Kaohsiung 807, Taiwan

<sup>f</sup>. Department of Obstetrics and Gynecology, Kaohsiung Medical University Hospital, Kaohsiung 807, Taiwan

<sup>g</sup>. Faculty and College of Medicine, Kaohsiung Medical University, Kaohsiung 807, Taiwan

<sup>h</sup>. Department of Chemistry, National Tsing Hua University, Hsinchu 300, Taiwan

<sup>i</sup>. Department of Chemistry, Chung Yuan Christian University, Taoyuan 320, Taiwan

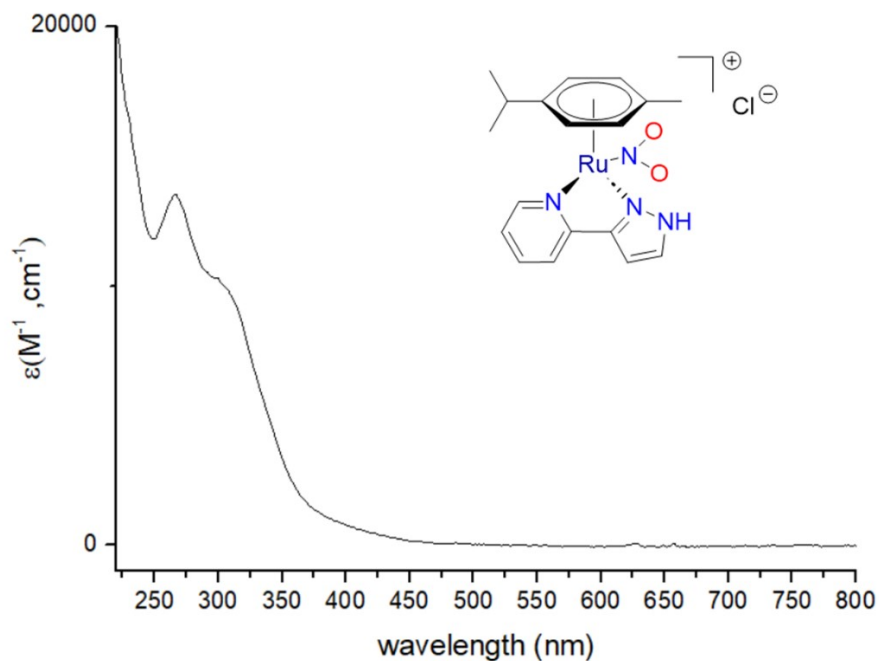

**Figure S1.** UV-Vis spectrum of **Ru4** (CH<sub>3</sub>OH, 10<sup>-4</sup>M)

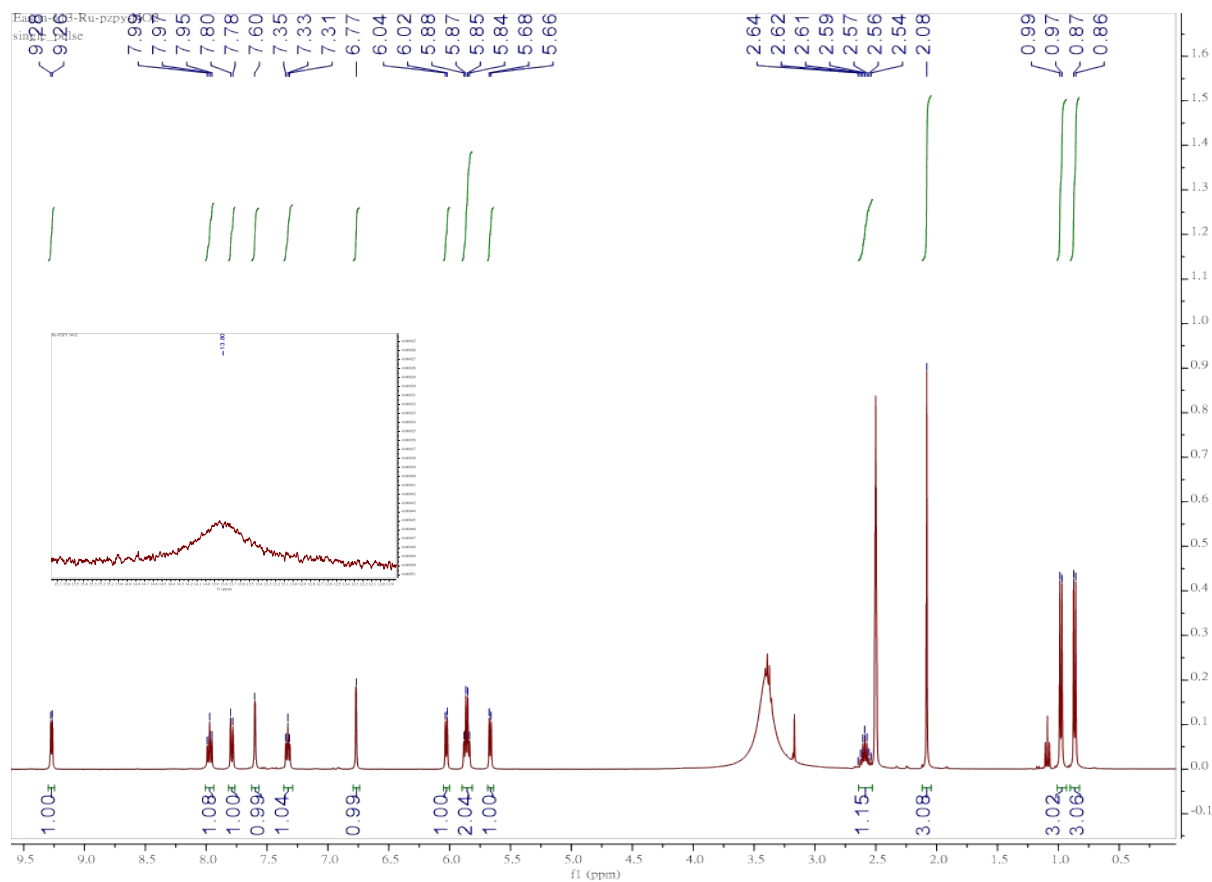

**Figure S2.** <sup>1</sup>H NMR spectrum for complex **Ru4** in d-DMSO.

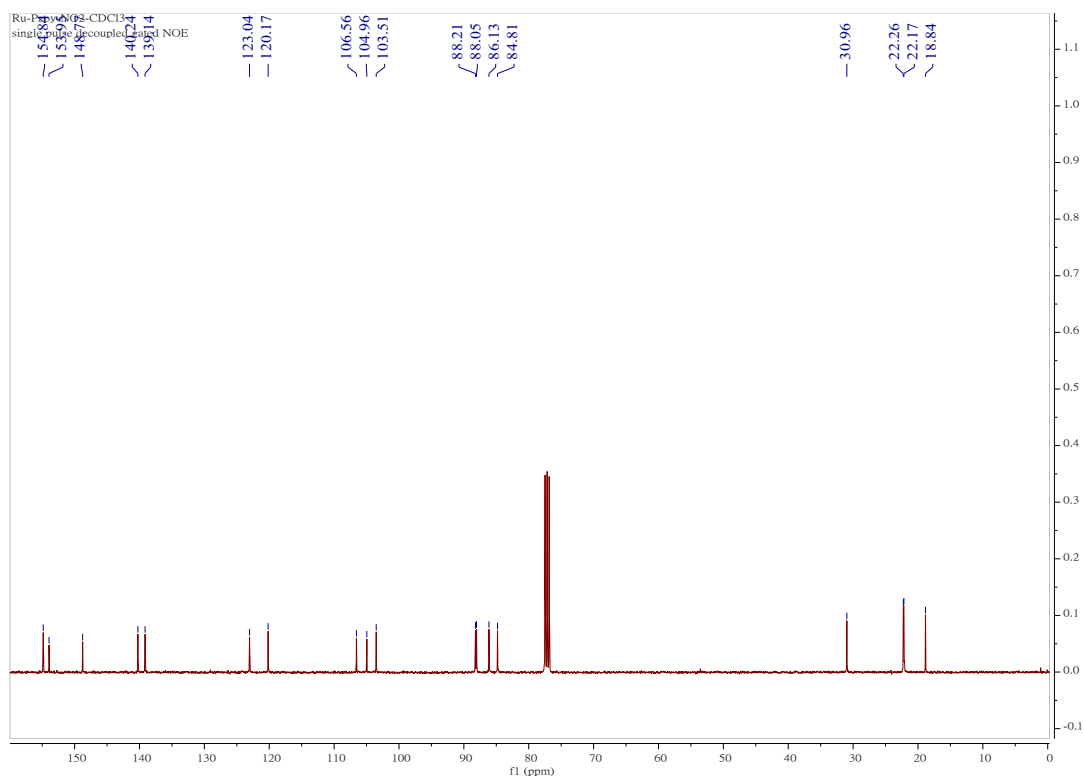

**Figure S3.**  $^{13}\text{C}$  NMR spectrum for complex **Ru4** in  $\text{CDCl}_3$ .

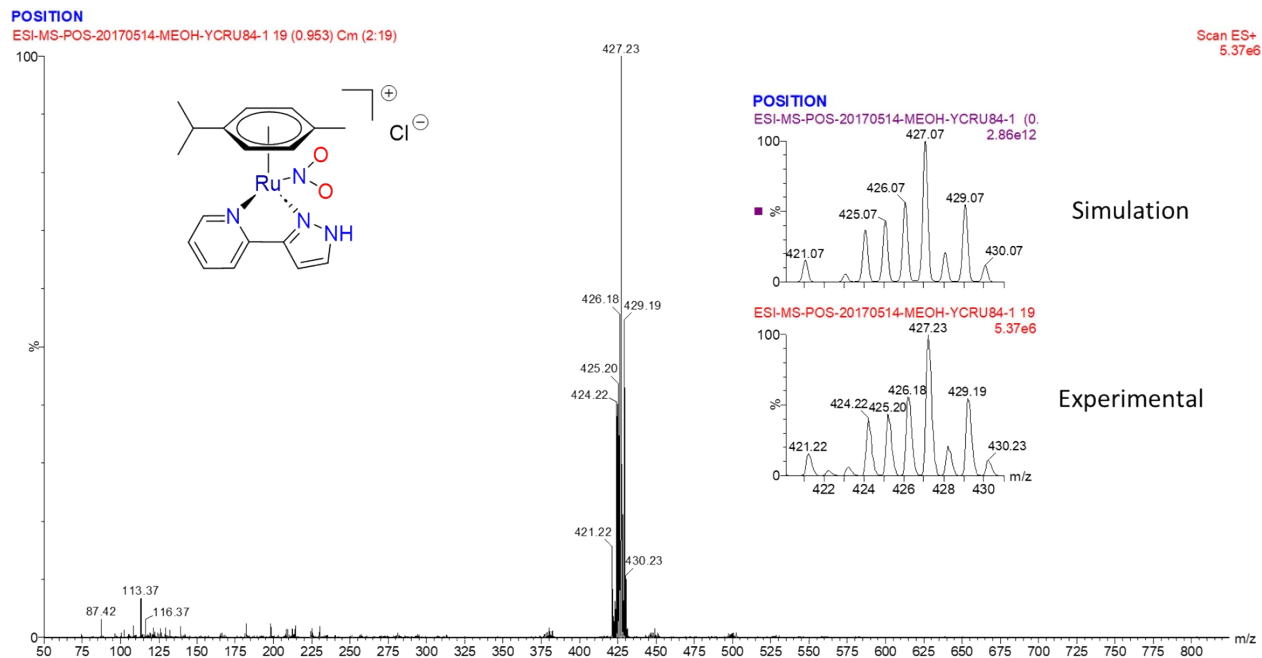

**Figure S4A.** ESI-Mass spectrum for complex **Ru4** in water [*p*-cymene-Ru-pzpy-NO<sub>2</sub>]<sup>+</sup> (*m/z* = 427.23).

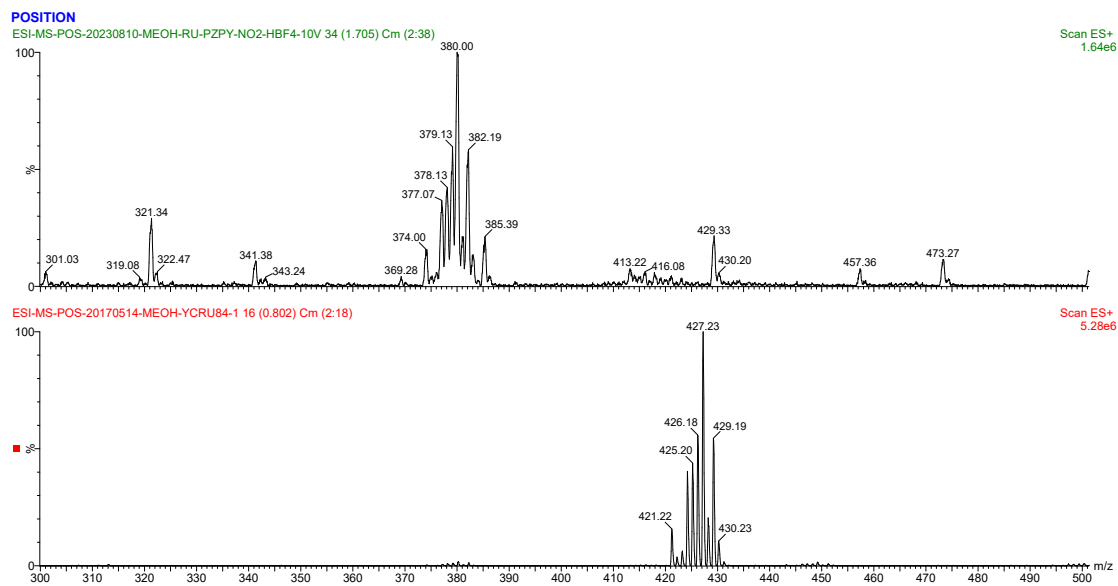

**Figure S4B.** ESI-Mass monitoring spectra of **Ru4** (down) and after **Ru4** treatment with HBF<sub>4</sub> (top). The signals at 427.23 *m/z* represent species [**Ru4**]<sup>+</sup>, and signals at *m/z* 380.00 represent species [**Ru4**-NO<sub>2</sub>-H]<sup>+</sup>.

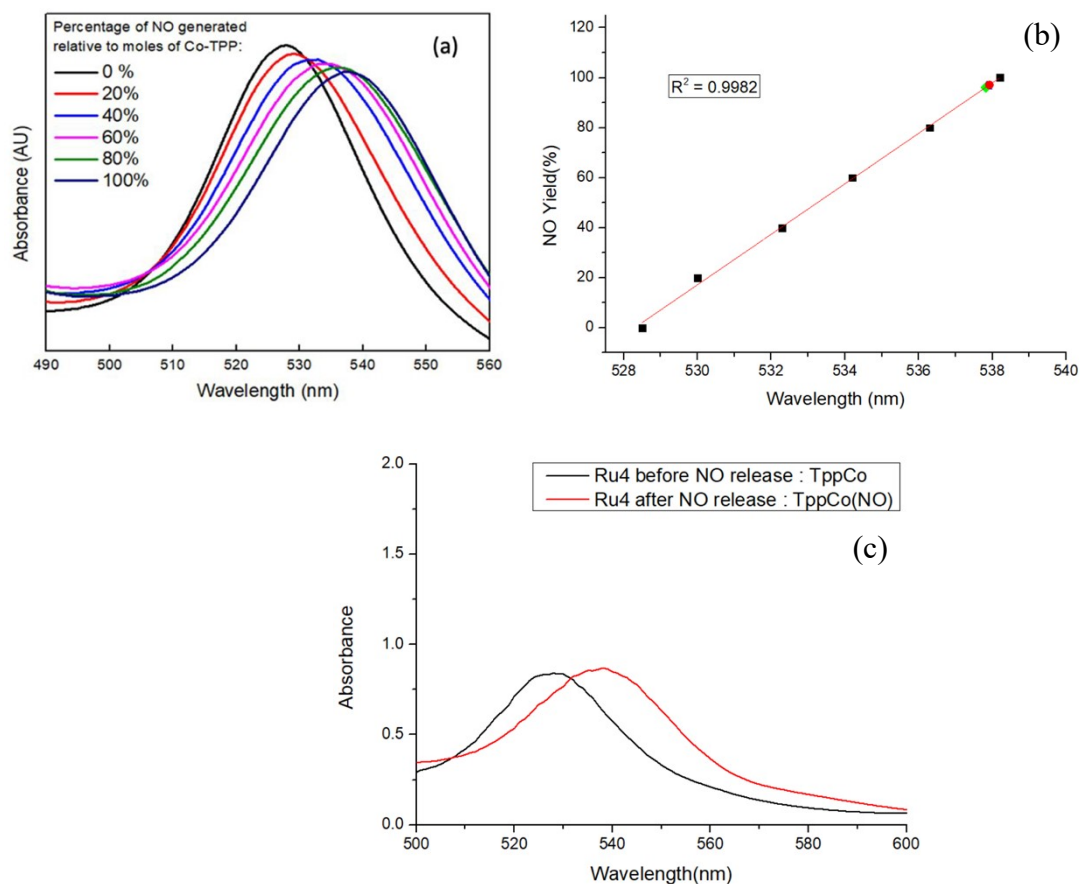

**Figure S5.** (a) UV-vis spectra showing the shift in the absorbance band of cobalt(II) porphyrin Co(TPP) (TPP = tetraphenylporphyrin) with increasing levels of complexation to NO. (b) Calibration curve extracted from the peak maxima, showing the linear trend in absorption maximum shift with % complexation to NO. The red dot is the NO generation yield in 96% of **Ru4**. (c) NO generation experiments for **Ru4**.

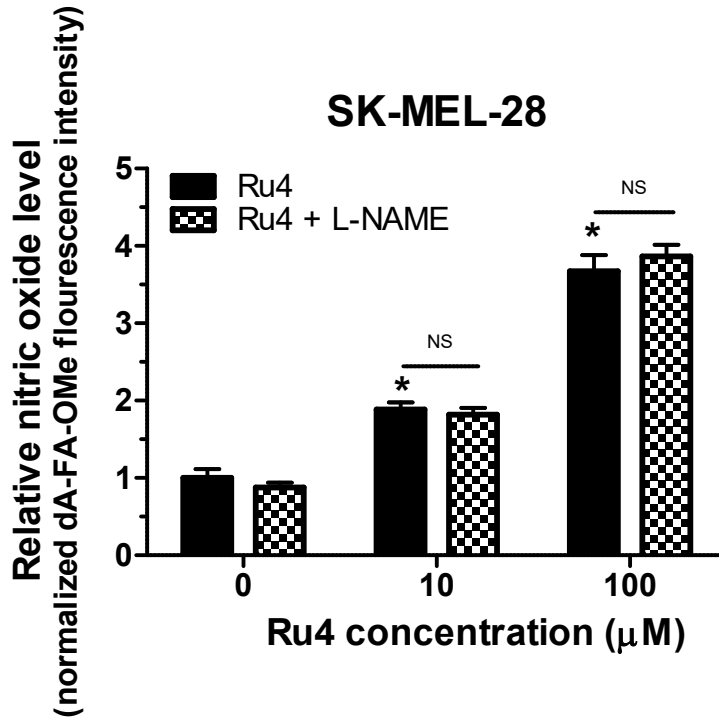

**Figure S6. Ru4** treatments increased NO levels in SK-MEL-28 cells. Cultured SK-MEL-28 cells were treated with 10 or 100  $\mu\text{M}$  of Ru4 for 24 h. After treatment, the NO production was detected by dA-FA-OMe probe. Non-fluorescent FA-OMe can specifically interact with NO and form the fluorescent product dA-FA-OMe. The generated fluorescence in SK-MEL-28 cells were detected by flow cytometry with 488 nm excitation laser. \* $p < 0.05$ , Ru4 treated vs untreated by the Kruskal-Wallis test; N = 3, means  $\pm$  SD.

**Antibody: Caspase-9**

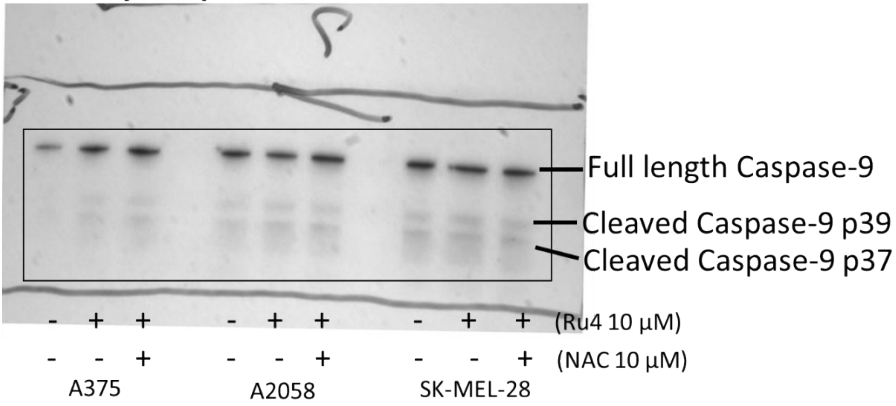

**Antibody: Caspase-8**

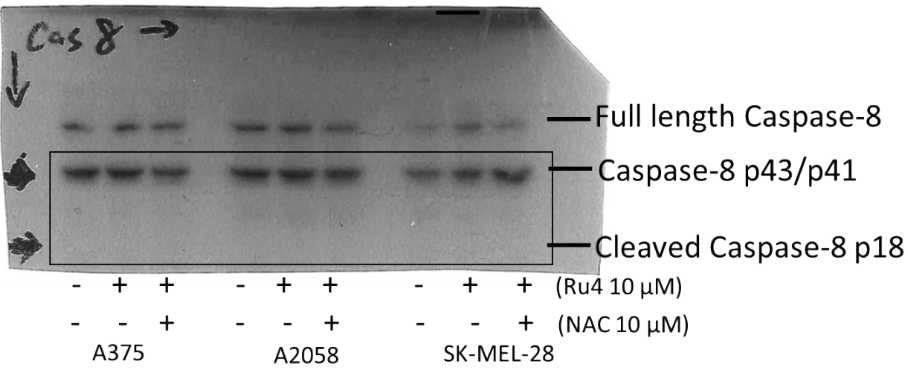

**Antibody: GAPDH**

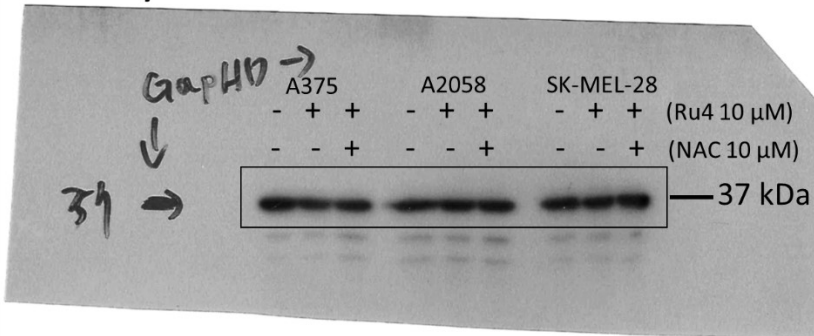

**Figure S7.** Western blotting images from Ru4/NAC treated A375, A2058 or SK-MEL-28 cells. The cleaved caspase 9/8 were their active forms.

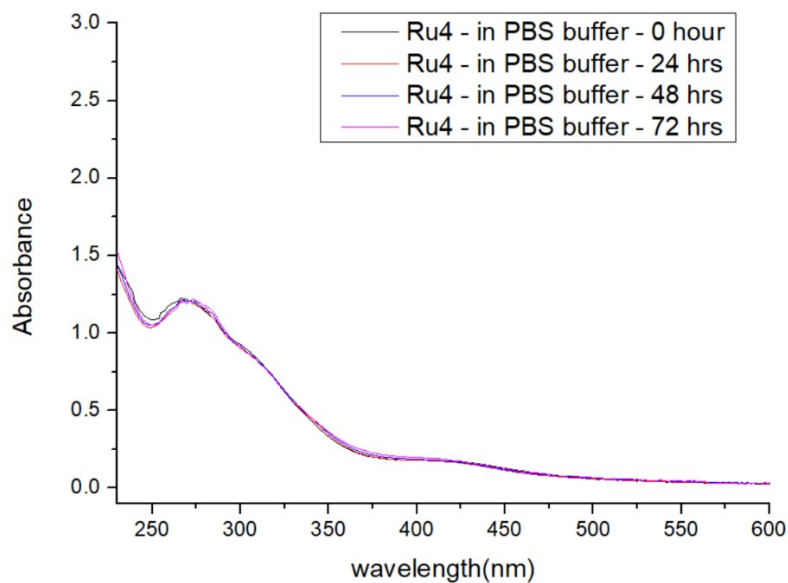

Figure S8. Time dependence of UV-vis spectra of the complex **Ru4** in phosphate-buffered saline (PBS, pH = 7.4) buffer.

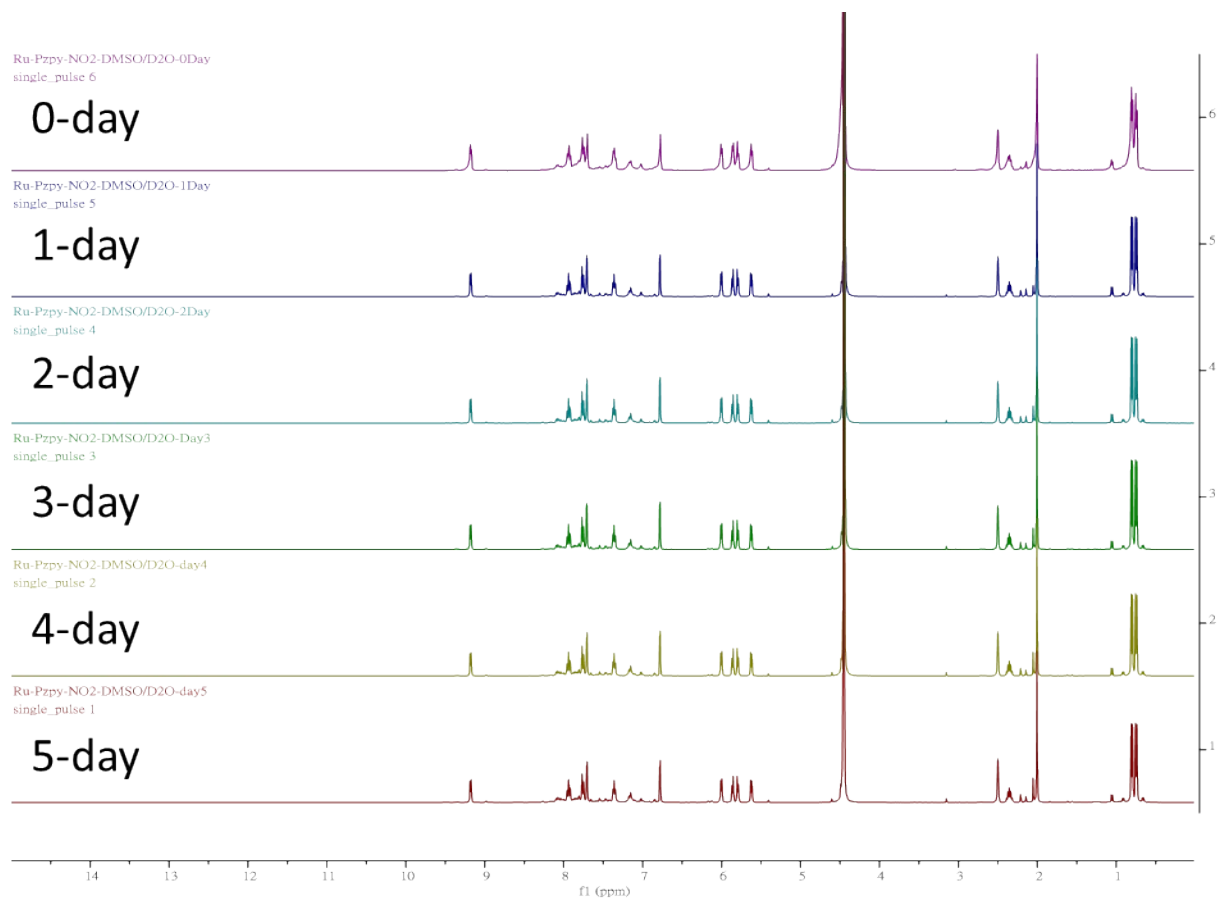

Figure S9. Time dependence of  $^1\text{H}$  NMR spectra of the complex **Ru4** in a 1:1  $\text{D}_2\text{O}/\text{DMSO-d}_6$  solution.



**Table S1.** Crystal data and structure refinement for complex **Ru4-PF<sub>6</sub>**

| <b>Crystallographic Parameters</b>        | <b>Complex Ru4-PF<sub>6</sub></b>                                                 |
|-------------------------------------------|-----------------------------------------------------------------------------------|
| CCDC Number                               | 2256904                                                                           |
| Empirical formula                         | C <sub>18</sub> H <sub>21</sub> F <sub>6</sub> N <sub>4</sub> O <sub>2</sub> P Ru |
| Formula weight                            | 571.43                                                                            |
| Temperature                               | 200(2)K                                                                           |
| Crystal system                            | Monoclinic                                                                        |
| Space group                               | P <sub>2</sub> 1/c                                                                |
| a Å                                       | 13.5961(4)                                                                        |
| b Å                                       | 14.7808(5)                                                                        |
| c Å                                       | 10.8245(3)                                                                        |
| α deg                                     | 90                                                                                |
| β deg                                     | 96.1970(1)                                                                        |
| γ deg                                     | 90                                                                                |
| Z                                         | 4                                                                                 |
| Density (calc, Mg/m <sup>3</sup> )        | 1.755                                                                             |
| Absorption coefficient(mm <sup>-1</sup> ) | 0.873                                                                             |
| Crystal color, morphology                 | Yellow/prism                                                                      |
| Crystal size(mm <sup>3</sup> )            | 0.61 x 0.07 x 0.03                                                                |
| Refns meads/indep                         | 23947/3792                                                                        |
| Data/restrains/parameter                  | 3792 / 0 / 289                                                                    |
| GOF                                       | 1.111                                                                             |
| R <sub>int</sub>                          | 0.0370                                                                            |
| R <sub>1</sub> [I>2σ](all data)           | 0.0299/0.0650                                                                     |
| wR2 [I>2σ](all data)                      | 0.0370/0.0689                                                                     |
| max peak/hole(e/Å <sup>3</sup> )          | 0.551/-0.561                                                                      |
